# Supplementary material for: Origin of Cancer: Cell work is the Key to Understanding Cancer Initiation and Progression
Source: PubMed Central journal article supplement (PMC8921603; doi:10.3389/fcell.2022.787995), 2022-03-01
Supplement: DataSheet2.pdf [file DataSheet2.pdf]

**Supplement 2:** Influence of different forms of cellular work on hallmarks of cancer.

| Hallmarks of cancer cells                      | Synthesis/degradation catalysis                                                                                                                                                                                                                                                                                                                                                                                                                                                                                                                                                                                             | Concentration work                                                                                                                                                                                                                                                                                                                                                                                                                                                                                                                                                                                                                                                                                                                                                                                                                                                                                                                                                                                                                                                                                                                                                                                                                                                                                                                                                                                      | Electrical work                                                                                                                                                                                                                                                                                                                                                                                                                                                                                                                                                                                                                                                                                                                       | Mechanical work                                                                                                                                                                                                                                                                                                                                                                                                                                                                                                                                                                                                                                                                                                                                                                                                                                                                                                                                                                                                                                                                                                                                                                                                                                                                                                                                                                                                                                                        |
|------------------------------------------------|-----------------------------------------------------------------------------------------------------------------------------------------------------------------------------------------------------------------------------------------------------------------------------------------------------------------------------------------------------------------------------------------------------------------------------------------------------------------------------------------------------------------------------------------------------------------------------------------------------------------------------|---------------------------------------------------------------------------------------------------------------------------------------------------------------------------------------------------------------------------------------------------------------------------------------------------------------------------------------------------------------------------------------------------------------------------------------------------------------------------------------------------------------------------------------------------------------------------------------------------------------------------------------------------------------------------------------------------------------------------------------------------------------------------------------------------------------------------------------------------------------------------------------------------------------------------------------------------------------------------------------------------------------------------------------------------------------------------------------------------------------------------------------------------------------------------------------------------------------------------------------------------------------------------------------------------------------------------------------------------------------------------------------------------------|---------------------------------------------------------------------------------------------------------------------------------------------------------------------------------------------------------------------------------------------------------------------------------------------------------------------------------------------------------------------------------------------------------------------------------------------------------------------------------------------------------------------------------------------------------------------------------------------------------------------------------------------------------------------------------------------------------------------------------------|------------------------------------------------------------------------------------------------------------------------------------------------------------------------------------------------------------------------------------------------------------------------------------------------------------------------------------------------------------------------------------------------------------------------------------------------------------------------------------------------------------------------------------------------------------------------------------------------------------------------------------------------------------------------------------------------------------------------------------------------------------------------------------------------------------------------------------------------------------------------------------------------------------------------------------------------------------------------------------------------------------------------------------------------------------------------------------------------------------------------------------------------------------------------------------------------------------------------------------------------------------------------------------------------------------------------------------------------------------------------------------------------------------------------------------------------------------------------|
| <b>Immortality</b>                             | Cagatay Gunesb, Alush Irene Avilaa, K. Lenhard Rudolph. <b>Telomeres in cancer.</b> Differentiation 99, 41–50 (2018). <a href="https://doi.org/10.1016/j.diff.2017.12.004">https://doi.org/10.1016/j.diff.2017.12.004</a><br><br>Lifeng Xu, Shang Li, Bradley A Stohr. <b>The Role of Telomere Biology in Cancer.</b> Annu Rev Pathol Mech Dis 8, 1, (2012). DOI: 10.1146/annurev-pathol-020712-164030                                                                                                                                                                                                                      | Natalia Prevarskaya, Roman Skryma, Yaroslav Shuba. <b>Ion channels and the hallmarks of cancer.</b> Trends Mol Med., 16(3):107-21 (2010). doi: 10.1016/j.molmed.2010.01.005.<br><i>Ion channels have a decisive influence on signal transmission and can simulate mutational effects in signaling cascades. They have an influence on all hallmarks and characteristics of cancer cells.</i>                                                                                                                                                                                                                                                                                                                                                                                                                                                                                                                                                                                                                                                                                                                                                                                                                                                                                                                                                                                                            |                                                                                                                                                                                                                                                                                                                                                                                                                                                                                                                                                                                                                                                                                                                                       |                                                                                                                                                                                                                                                                                                                                                                                                                                                                                                                                                                                                                                                                                                                                                                                                                                                                                                                                                                                                                                                                                                                                                                                                                                                                                                                                                                                                                                                                        |
| <b>Continued proliferation</b>                 | Weinberg Robert. <b>The biology of cancer.</b> Second Edition, Garland Science. (2014). ISBN: 978-0-0153-4219-9<br><br>Li-Hui Wanga Chun-Fu Wua Nirmal Rajasekaranb Young Kee Shinb. <b>Loss of Tumor Suppressor Gene Function in Human Cancer: An Overview.</b> Cell Physiol Biochem. 51:2647-2693 (2018). DOI: 10.1159/000495956<br><br>Gimple RC and Wang X. <b>RAS Striking at the Core of the Oncogenic Circuitry.</b> Front. Oncol. 9:965. (2019). doi: 10.3389/fonc.2019.00965<br><br>T. Zhan, N. Rindtorff and M. Boutros. <b>Wnt signaling in cancer.</b> Oncogene 36, 1461–1473, (2017). doi:10.1038/onc.2016.304 | Donna Dang, RajiniRao. <b>Calcium-ATPases: Gene disorders and dysregulation in cancer.</b> Biochimica et Biophysica Acta (BBA) - Molecular Cell Research, Vol. 1863, 6, Part B, 1344-1350 (2016) <a href="https://doi.org/10.1016/j.bbamcr.2015.11.016">https://doi.org/10.1016/j.bbamcr.2015.11.016</a><br><br>Litan A and Langhans SA. <b>Cancer as a channelopathy: ion channels and pumps in tumor development and progression.</b> Front. Cell. Neurosci. 9:86. (2015). doi: 10.3389/fncel.2015.00086<br><br>Litan A and Langhans SA. <b>Cancer as a channelopathy: ion channels and pumps in tumor development and progression.</b> Front. Cell. Neurosci. 9:86. (2015). doi: 10.3389/fncel.2015.00086<br><br>Swietach P, Vaughan-Jones, RD, Harris AL, Hulikova A. <b>The chemistry, physiology and pathology of pH in cancer.</b> Phil. Trans. R. Soc. B 369: 20130099. (2014). <a href="http://dx.doi.org/10.1098/rstb.2013.0099">http://dx.doi.org/10.1098/rstb.2013.0099</a><br><br>Natalia Prevarskaya, Roman Skryma, Yaroslav Shuba. <b>Ion channels and the hallmarks of cancer.</b> Trends Mol Med., 16(3):107-21 (2010). doi: 10.1016/j.molmed.2010.01.005. Epub 2010 Feb 16.<br><br>Zoltán Pethő, Karolina Najder, Etma rBulk, Albrecht Schwab. <b>Mechanosensitive ion channels push cancer progression.</b> Cell Calcium, Vol. 80, 79-90. (2019). doi.org/10.1016/j.ceca.2019.03.007 | Chiara Galber, Manuel Jesus Acosta, Giovanni Minervini and Valentina Giorgio. <b>The role of mitochondrial ATP synthase in cancer.</b> Biological Chemistry, 401:11, 1199–1214 (2020). doi.org/10.1515/hsz-2020-0157<br><br>Laura Stransky, Kristina Cotter and Michael Forgac. <b>The Function of V-ATPases in Cancer.</b> Pysiol. Rev. Vol. 96, 3, 1071-1091 (2016). doi.org/10.1152/physrev.00035.2015<br><br>Laura Stransky, Kristina Cotter and Michael Forgac. <b>The Function of V-ATPases in Cancer.</b> Pysiol. Rev. Vol. 96, 3, 1071-1091 (2016). doi.org/10.1152/physrev.00035.2015                                                                                                                                        | Sneeggen M, Guadagno NA and Progida C. <b>Intracellular Transport in Cancer Metabolic Reprogramming.</b> Front. Cell Dev. Biol. 8:597608 (2020). doi: 10.3389/fcell.2020.597608<br><br>Benjamin L Ricca, Gautham Venugopalan, Saori Furuta, Kandice Tanner, et al. <b>Transient external force induces phenotypic reversion of malignant epithelial structures via nitric oxide signaling.</b> eLIFE (2018). eLife 2018;7:e26161 doi: 10.7554/eLife.26161<br><br>Humphrey, J., Dufresne, E. & Schwartz, M. <b>Mechanotransduction and extracellular matrix homeostasis.</b> Nat Rev Mol Cell Biol 15, 802–812 (2014). doi.org/10.1038/nrm3896<br><br>Elster JD, McGuire TF, Lu J, Prochownik EV. <b>Rapid In Vitro Derivation of Endothelium Directly from Human Cancer Cells.</b> PLoS ONE 8(10): e77675. (2013). doi:10.1371/journal.pone.0077675<br><br>Butcher DT, Alliston T, Weaver VM. <b>A tense situation: forcing tumour progression.</b> Nat Rev Cancer. 9(2):108-122. (2009) doi:10.1038/nrc2544<br><br>Sui Huang and Donald E. Ingber. <b>Cell tension, matrix mechanics, and cancer development.</b> Cancer Cell, Vol. 8, 3, 175-176 (2005). doi.org/10.1016/j.ccr.2005.08.009<br><br>Schwartz, L., da Veiga Moreira, J. and Jolicœur, M. (2018), <b>Physical forces modulate cell differentiation and proliferation processes.</b> J. Cell. Mol. Med., 22: 738-745. <a href="https://doi.org/10.1111/jcmm.13417">https://doi.org/10.1111/jcmm.13417</a> |
| <b>Circumventing physiological cell death</b>  | Weinberg Robert. <b>The biology of cancer.</b> Second Edition, Garland Science. (2014) ISBN: 978-0-0153-4219-9<br><br>Li-Hui Wanga Chun-Fu Wua Nirmal Rajasekaranb Young Kee Shinb. <b>Loss of Tumor Suppressor Gene Function in Human Cancer: An Overview.</b> Cell Physiol Biochem. 51:2647-2693 (2018). DOI: 10.1159/000495956                                                                                                                                                                                                                                                                                           | Donna Dang, RajiniRao. <b>Calcium-ATPases: Gene disorders and dysregulation in cancer.</b> Biochimica et Biophysica Acta (BBA) - Molecular Cell Research, Vol. 1863, 6, Part B, 1344-1350 (2016) doi.org/10.1016/j.bbamcr.2015.11.016<br><br>Litan A and Langhans SA. <b>Cancer as a channelopathy: ion channels and pumps in tumor development and progression.</b> Front. Cell. Neurosci. 9:86 (2015). doi: 10.3389/fncel.2015.00086<br><br>Natalia Prevarskaya, Roman Skryma, Yaroslav Shuba. <b>Ion channels and the hallmarks of cancer.</b> Trends Mol Med., 16(3):107-21 (2010). doi: 10.1016/j.molmed.2010.01.005. Epub 2010 Feb 16.                                                                                                                                                                                                                                                                                                                                                                                                                                                                                                                                                                                                                                                                                                                                                            | Chiara Galber, Manuel Jesus Acosta, Giovanni Minervini and Valentina Giorgio. <b>The role of mitochondrial ATP synthase in cancer.</b> Biological Chemistry, 401:11, 1199–1214 (2020) DOI: <a href="https://doi.org/10.1515/hsz-2020-0157">https://doi.org/10.1515/hsz-2020-0157</a><br><br>Laura Stransky, Kristina Cotter and Michael Forgac. <b>The Function of V-ATPases in Cancer.</b> Pysiol. Rev. Vol. 96, 3, 1071-1091 (2016). doi.org/10.1152/physrev.00035.2015<br><br>Evangelos Giampazolias and Stephen W.G. Tait. <b>Mitochondria and the hallmarks of cancer.</b> FEBS Journal 283 803–814 (2016) doi:10.1111/febs.13603                                                                                                | Cheng G, Tse J, Jain RK, Munn LL. <b>Micro-Environmental Mechanical Stress Controls Tumor Spheroid Size and Morphology by Suppressing Proliferation and Inducing Apoptosis in Cancer Cells.</b> PLoS ONE 4(2): e4632 (2009). doi:10.1371/journal.pone.0004632<br><br>Chartier, N.T., Mukherjee, A., Pfanzelter, J. et al. <b>A hydraulic instability drives the cell death decision in the nematode germline.</b> Nat. Phys. 17, 920–925 (2021). <a href="https://doi.org/10.1038/s41567-021-01235-x">https://doi.org/10.1038/s41567-021-01235-x</a>                                                                                                                                                                                                                                                                                                                                                                                                                                                                                                                                                                                                                                                                                                                                                                                                                                                                                                                   |
| <b>Circumventing growth suppression</b>        | Weinberg Robert. <b>The biology of cancer.</b> Second Edition, Garland Science. (2014). ISBN: 978-0-0153-4219-9<br><br>Li-Hui Wanga Chun-Fu Wua Nirmal Rajasekaranb Young Kee Shinb. <b>Loss of Tumor Suppressor Gene Function in Human Cancer: An Overview.</b> Cell Physiol Biochem. 51:2647-2693 (2018). DOI: 10.1159/000495956                                                                                                                                                                                                                                                                                          | Donna Dang, RajiniRao. <b>Calcium-ATPases: Gene disorders and dysregulation in cancer.</b> Biochimica et Biophysica Acta (BBA) - Molecular Cell Research, Vol. 1863, 6, Part B, 1344-1350 (2016). <a href="https://doi.org/10.1016/j.bbamcr.2015.11.016">https://doi.org/10.1016/j.bbamcr.2015.11.016</a><br><br>Litan A and Langhans SA. <b>Cancer as a channelopathy: ion channels and pumps in tumor development and progression.</b> Front. Cell. Neurosci. 9:86. (2015). doi: 10.3389/fncel.2015.00086                                                                                                                                                                                                                                                                                                                                                                                                                                                                                                                                                                                                                                                                                                                                                                                                                                                                                             |                                                                                                                                                                                                                                                                                                                                                                                                                                                                                                                                                                                                                                                                                                                                       |                                                                                                                                                                                                                                                                                                                                                                                                                                                                                                                                                                                                                                                                                                                                                                                                                                                                                                                                                                                                                                                                                                                                                                                                                                                                                                                                                                                                                                                                        |
| <b>Disturbed energy balance and metabolism</b> | Ralph J Deberardinis. <b>Is cancer a disease of abnormal cellular metabolism? New angles on an old idea.</b> Genetics in Medicine, vol 10, 767–777 (2008)<br><br>Sinkala, M., Mulder, N. & Patrick Martin, D. <b>Metabolic gene alterations impact the clinical aggressiveness and drug responses of 32 human cancers.</b> Commun Biol 2, 414 (2019). <a href="https://doi.org/10.1038/s42003-019-0666-1">https://doi.org/10.1038/s42003-019-0666-1</a>                                                                                                                                                                     |                                                                                                                                                                                                                                                                                                                                                                                                                                                                                                                                                                                                                                                                                                                                                                                                                                                                                                                                                                                                                                                                                                                                                                                                                                                                                                                                                                                                         | Chiara Galber, Manuel Jesus Acosta, Giovanni Minervini and Valentina Giorgio. <b>The role of mitochondrial ATP synthase in cancer.</b> Biological Chemistry, 401:11, 1199–1214 (2020) doi.org/10.1515/hsz-2020-0157<br><br>Evangelos Giampazolias and Stephen W.G. Tait. <b>Mitochondria and the hallmarks of cancer.</b> FEBS Journal 283 803–814 (2016). doi:10.1111/febs.13603<br><br>Gatenby, R., Gillies, R. <b>Why do cancers have high aerobic glycolysis?</b> Nat Rev Cancer 4, 891–899 (2004). doi.org/10.1038/nrc1478<br><br>Warburg, Otto. <b>“On the Origin of Cancer Cells.”</b> Science, vol. 123, no. 3191, 1956, pp. 309–314. JSTOR, <a href="http://www.jstor.org/stable/1750066">www.jstor.org/stable/1750066</a> . | Park, J.S., Burckhardt, C.J., Lazcano, R. et al. <b>Mechanical regulation of glycolysis via cytoskeleton architecture.</b> Nature 578, 621–626 (2020). <a href="https://doi.org/10.1038/s41586-020-1998-1">https://doi.org/10.1038/s41586-020-1998-1</a><br><br>Isogai, T., Park, J. and Danuser, G. <b>Cell forces meet cell metabolism.</b> Nat Cell Biol 19, 591–593 (2017). doi.org/10.1038/ncb3542<br><br>Romani, P., Valcarcel-Jimenez, L., Frezza, C. et al. <b>Crosstalk between mechanotransduction and metabolism.</b> Nat Rev Mol Cell Biol 22, 22–38 (2021). <a href="https://doi.org/10.1038/s41580-020-00306-w">https://doi.org/10.1038/s41580-020-00306-w</a><br><br>Clifford P. Brangwynne, Timothy J. Mitchison, Anthony A. Hyman. <b>Active liquid-like behavior of nucleoli determines their size and shape in Xenopus laevis oocytes.</b> PNAS, 108 (11) 4334-4339, (2011). DOI: 10.1073/pnas.1017150108 ATP loss leads to viscosity changes of the nucleoli.                                                                                                                                                                                                                                                                                                                                                                                                                                                                                      |
| <b>Invasion und Metastasierung</b>             | Fares, J., Fares, M.Y., Khachfe, H.H. et al. <b>Molecular principles of metastasis: a hallmark of cancer revisited.</b> Sig Transduct Target Ther 5, 28 (2020). <a href="https://doi.org/10.1038/s41392-020-0134-x">https://doi.org/10.1038/s41392-020-0134-x</a><br><br>Ross C, Szczepanek K, Lee M, Yang H, Qiu T, Sanford JD, et al. <b>The genomic landscape of metastasis in treatment-naïve breast cancer models.</b> PLoS Genet 16(5): e1008743. (2020). doi.org/10.1371/journal.pgen.1008743                                                                                                                        | Donna Dang, RajiniRao. <b>Calcium-ATPases: Gene disorders and dysregulation in cancer.</b> Biochimica et Biophysica Acta (BBA) - Molecular Cell Research, Vol. 1863, 6, Part B, 1344-1350 (2016). doi.org/10.1016/j.bbamcr.2015.11.016<br><br>Litan A and Langhans SA. <b>Cancer as a channelopathy: ion channels and pumps in tumor development and progression.</b> Front. Cell. Neurosci. 9:86 (2015). doi: 10.3389/fncel.2015.00086<br><br>Natalia Prevarskaya 1, Roman Skryma, Yaroslav Shuba. <b>Ion channels and the hallmarks of cancer.</b> Trends Mol Med., 16(3):107-21 (2010). doi: 10.1016/j.molmed.2010.01.005.                                                                                                                                                                                                                                                                                                                                                                                                                                                                                                                                                                                                                                                                                                                                                                           | Chiara Galber, Manuel Jesus Acosta, Giovanni Minervini and Valentina Giorgio. <b>The role of mitochondrial ATP synthase in cancer.</b> Biological Chemistry, 401:11, 1199–1214 (2020). doi.org/10.1515/hsz-2020-0157<br><br>Evangelos Giampazolias and Stephen W.G. Tait. <b>Mitochondria and the hallmarks of cancer.</b> FEBS Journal 283 803–814 (2016). doi:10.1111/febs.13603<br><br>Laura Stransky, Kristina Cotter and Michael Forgac. <b>The Function of V-ATPases in Cancer.</b> Pysiol. Rev. Vol. 96, 3, 1071-1091 (2016) <a href="https://doi.org/10.1152/physrev.00035.2015">https://doi.org/10.1152/physrev.00035.2015</a>                                                                                               | Janet M. Tse, Gang Cheng, James A. Tyrrell, Sarah A., et al. <b>Mechanical compression drives cancer cells toward invasive phenotype.</b> PNAS, 109 (3) 911-916, (2012). doi:10.1073/pnas.1118910109                                                                                                                                                                                                                                                                                                                                                                                                                                                                                                                                                                                                                                                                                                                                                                                                                                                                                                                                                                                                                                                                                                                                                                                                                                                                   |

|                                                              |                                                                                                                                                                                                                                                                                                                                                                                                                                                                                                                                                                                                                                                                                                                                                                                                                                                                                                                                                                                                                                                                                                                                                                                                                                                                                                                                                                                                                                                                                                                                                                                                                                                                                                                                                                                                                                           |                                                                                                                                                                                                                                                                                                                                                                                                                                                                                                                                                                                                                                                                                                                                                                                                                                                                                                        |                                                                                                                                                                                                                                                                                                                                                                                           |                                                                                                                                                                                                                                                                                                                                                                                                                                                                                                                                                                                                                                                                                                                                                                                                                                                                                                                                                                                                                                                                                                                                                                                                                                                                                                                                                                                                                                       |
|--------------------------------------------------------------|-------------------------------------------------------------------------------------------------------------------------------------------------------------------------------------------------------------------------------------------------------------------------------------------------------------------------------------------------------------------------------------------------------------------------------------------------------------------------------------------------------------------------------------------------------------------------------------------------------------------------------------------------------------------------------------------------------------------------------------------------------------------------------------------------------------------------------------------------------------------------------------------------------------------------------------------------------------------------------------------------------------------------------------------------------------------------------------------------------------------------------------------------------------------------------------------------------------------------------------------------------------------------------------------------------------------------------------------------------------------------------------------------------------------------------------------------------------------------------------------------------------------------------------------------------------------------------------------------------------------------------------------------------------------------------------------------------------------------------------------------------------------------------------------------------------------------------------------|--------------------------------------------------------------------------------------------------------------------------------------------------------------------------------------------------------------------------------------------------------------------------------------------------------------------------------------------------------------------------------------------------------------------------------------------------------------------------------------------------------------------------------------------------------------------------------------------------------------------------------------------------------------------------------------------------------------------------------------------------------------------------------------------------------------------------------------------------------------------------------------------------------|-------------------------------------------------------------------------------------------------------------------------------------------------------------------------------------------------------------------------------------------------------------------------------------------------------------------------------------------------------------------------------------------|---------------------------------------------------------------------------------------------------------------------------------------------------------------------------------------------------------------------------------------------------------------------------------------------------------------------------------------------------------------------------------------------------------------------------------------------------------------------------------------------------------------------------------------------------------------------------------------------------------------------------------------------------------------------------------------------------------------------------------------------------------------------------------------------------------------------------------------------------------------------------------------------------------------------------------------------------------------------------------------------------------------------------------------------------------------------------------------------------------------------------------------------------------------------------------------------------------------------------------------------------------------------------------------------------------------------------------------------------------------------------------------------------------------------------------------|
| <p><b>Genomic instability</b></p>                            | <p>Elisabeth S. Wenzel, Amareshwaar T. K. Singh. <b>Cell-cycle Checkpoints and Aneuploidy on the Path to Cancer</b>. <i>In Vivo</i>, 32, 1-5, (2018). doi:10.21873/invivo.11197</p> <p>Maciejowski, J., de Lange, T. <b>Telomeres in cancer: tumour suppression and genome instability</b>. <i>Nat Rev Mol Cell Biol</i> 18, 175–186 (2017). doi.org/10.1038/nrm.2016.171</p> <p>Lifeng Xu Lifeng XuShang Li Bradley A Stohr. <b>The Role of Telomere Biology in Cancer</b>. <i>Annu Rev Pathol Mech Dis</i> 8, 1, (2012). DOI: 10.1146/annurev-pathol-020712-164030</p>                                                                                                                                                                                                                                                                                                                                                                                                                                                                                                                                                                                                                                                                                                                                                                                                                                                                                                                                                                                                                                                                                                                                                                                                                                                                  | <p>Joshua R.Veatth, Michael A.McMurray, Zara W.Nelson, Daniel E.Gottschling. <b>Mitochondrial Dysfunction Leads to Nuclear Genome Instability via an Iron-Sulfur Cluster Defect</b>. <i>Cell</i>, Vol 137, 7, 1247-1258 (2009)</p>                                                                                                                                                                                                                                                                                                                                                                                                                                                                                                                                                                                                                                                                     | <p>Evangelos Giampazolias and Stephen W.G. Tait. <b>Mitochondria and the hallmarks of cancer</b>. <i>FEBS Journal</i> 283 803–814 (2016). doi:10.1111/febs.13603</p>                                                                                                                                                                                                                      | <p>Takeshi Itabashi, Yasuhiko Terada, et al. <b>Mechanical impulses control metaphase progression</b>. <i>PNAS</i>, 109 (19) 7320-7325 (2012). DOI: 10.1073/pnas.1116749109</p> <p>Fink, J., Carpi, N., Betz, T. et al. <b>External forces control mitotic spindle positioning</b>. <i>Nat Cell Biol</i> 13, 771–778 (2011). doi.org/10.1038/ncb2269</p> <p>Nicolas Minc, David Burgess, Fred Chang. <b>Influence of Cell Geometry on Division-Plane Positioning</b>. <i>Cell</i>, Vol. 144, 3, 414-426 (2011). doi.org/10.1016/j.cell.2011.01.016</p>                                                                                                                                                                                                                                                                                                                                                                                                                                                                                                                                                                                                                                                                                                                                                                                                                                                                                |
| <p><b>Tumour-promoting inflammation</b></p>                  | <p>Jennifer Kay, Elina Thadhani, Leona Samson, and Bevin Engelward. <b>Inflammation-Induced DNA Damage, Mutations and Cancer</b>. <i>DNA Repair</i>, 83: 102673 (2019). doi: 10.1016/j.dnarep.2019.102673</p> <p>Kawanishi, S.; Ohnishi, S.; Ma, N.; Hiraku, Y.; Murata, M. <b>Crosstalk between DNA Damage and Inflammation in the Multiple Steps of Carcinogenesis</b>. <i>Int. J. Mol. Sci.</i> 18, 1808 (2017) doi.org/10.3390/ijms18081808</p> <p>KJ O’Byrne and AG Dalglish. <b>Chronic immune activation and inflammation as the cause of malignancy</b>. <i>British Journal of Cancer</i> 85(4), 473–483 (2001)</p>                                                                                                                                                                                                                                                                                                                                                                                                                                                                                                                                                                                                                                                                                                                                                                                                                                                                                                                                                                                                                                                                                                                                                                                                               | <p>L.Munaron. <b>Systems biology of ion channels and transporters in tumor angiogenesis: An omics view</b>. <i>Biochimica et Biophysica Acta (BBA) - Biomembranes</i>, Vol. 1848, 10, Part B, Pages 2647-2656 (2015). doi.org/10.1016/j.bbamem.2014.10.031</p> <p>Fiorio Pla A, Munaron L.. <b>Functional properties of ion channels and transporters in tumour vascularization</b>. <i>Phil. Trans. R. Soc. B</i> 369: 20130103 (2014). dx.doi.org/10.1098/rstb.2013.0103</p>                                                                                                                                                                                                                                                                                                                                                                                                                         | <p>Evangelos Giampazolias and Stephen W.G. Tait. <b>Mitochondria and the hallmarks of cancer</b>. <i>FEBS Journal</i> 283 803–814 (2016). doi:10.1111/febs.13603</p> <p>Swietach P, Vaughan-Jones, RD, Harris AL, Hulikova A. <b>The chemistry, physiology, and pathology of pH in cancer</b>. <i>Phil. Trans. R. Soc. B</i> 369: 20130099. (2014). dx.doi.org/10.1098/rstb.2013.0099</p> |                                                                                                                                                                                                                                                                                                                                                                                                                                                                                                                                                                                                                                                                                                                                                                                                                                                                                                                                                                                                                                                                                                                                                                                                                                                                                                                                                                                                                                       |
| <p><b>Induction of angiogenesis</b></p>                      | <p>Lugano, R., Ramachandran, M. &amp; Dimberg, A. <b>Tumor angiogenesis: causes, consequences, challenges and opportunities</b>. <i>Cell. Mol. Life Sci.</i> 77, 1745–1770 (2020). https://doi.org/10.1007/s00018-019-03351-7</p> <p>S P Balasubramanian, N J Brown, and M W R Reed. <b>Role of genetic polymorphisms in tumour angiogenesis</b>. <i>Br J Cancer.</i> 4; 87(10): 1057–1065 (2002). doi: 10.1038/sj.bjc.6600625</p>                                                                                                                                                                                                                                                                                                                                                                                                                                                                                                                                                                                                                                                                                                                                                                                                                                                                                                                                                                                                                                                                                                                                                                                                                                                                                                                                                                                                        | <p>Natalia Prevarskaya, Roman Skryma, Yaroslav Shuba. <b>Ion Channels in Cancer: Are Cancer Hallmarks Oncochannelopathies?</b> <i>Physiol. Rev.</i> Vol 98, 2, 559-621 (2018) https://doi.org/10.1152/physrev.00044.2016</p> <p>Donna Dang, RajiniRao. <b>Calcium-ATPases: Gene disorders and dysregulation in cancer</b>. <i>Biochimica et Biophysica Acta (BBA) - Molecular Cell Research</i>, Vol. 1863, 6, Part B, 1344-1350 (2016) doi.org/10.1016/j.bbamcr.2015.11.016</p> <p>Litan A and Langhans SA. <b>Cancer as a channelopathy: ion channels and pumps in tumor development and progression</b>. <i>Front. Cell. Neurosci.</i> 9:86. (2015). doi: 10.3389/fncel.2015.00086</p> <p>Natalia Prevarskaya, Roman Skryma, Yaroslav Shuba. <b>Ion channels and the hallmarks of cancer</b>. <i>Trends Mol Med.</i>, 16(3):107-21 (2010). doi: 10.1016/j.molmed.2010.01.005. Epub 2010 Feb 16.</p> |                                                                                                                                                                                                                                                                                                                                                                                           | <p>Florence Broders-Bondon, Thanh Huong Nguyen Ho-Bouldoires et al. <b>Mechanotransduction in tumor progression: The dark side of the force</b>. <i>J Cell Biol.</i> 217(5), 1571–1587 (2018). doi: 10.1083/jcb.201701039</p> <p>LiKang Chin, Yuntao Xia, Dennis E Discher, and Paul A Janmey. <b>Mechanotransduction in cancer</b>. <i>Curr Opin Chem Eng.</i> 2016 Feb; 11: 77–84 (2016). doi: 10.1016/j.coche.2016.01.011</p> <p>Donald E. Ingber. <b>Mechanical Signaling and the Cellular Response to Extracellular Matrix in Angiogenesis and Cardiovascular Physiology</b>. <i>Circulation Research</i>, Vol. 91, 10, 877-887 (2002). doi.org/10.1161/01.RES.0000039537.73816.E5</p>                                                                                                                                                                                                                                                                                                                                                                                                                                                                                                                                                                                                                                                                                                                                           |
| <p><b>Prevention of destruction by the immune system</b></p> | <p>S.Vinaya Elizabeth, P.Ryan, Graham Pawelec et al. <b>Immune evasion in cancer: Mechanistic basis and therapeutic strategies</b>. <i>Seminars in Cancer Biology</i>, Vol. 35, Suppl. Dec., 185-198 (2015). doi.org/10.1016/j.semcancer.2015.03.004</p> <p>H. Gonzalez, C. Hagerling and Z. Werb. <b>Roles of the immune system in cancer: from tumor initiation to metastatic progression</b>. <i>Genes &amp; Dev.</i> 2018. 32: 1267-1284 (2018). doi: 10.1101/gad.314617.118</p> <p>Alka Bhatia &amp; Yashwant Kumar. <b>Cellular and molecular mechanisms in cancer immune escape: a comprehensive review</b>. <i>Expert Review of Clinical Immunology</i>, 10:1, 41-62 (2014). DOI: 10.1586/1744666X.2014.865519</p>                                                                                                                                                                                                                                                                                                                                                                                                                                                                                                                                                                                                                                                                                                                                                                                                                                                                                                                                                                                                                                                                                                                | <p>Veronica Huber, Chiara Camisaschi, Angela Berzi et al. <b>Cancer acidity: An ultimate frontier of tumor immune escape and a novel target of immunomodulation</b>. <i>Seminars in Cancer Biology</i>, Vol. 43, 74-89 (2017) doi.org/10.1016/j.semcancer.2017.03.001.</p>                                                                                                                                                                                                                                                                                                                                                                                                                                                                                                                                                                                                                             | <p>Laura Stransky, Kristina Cotter and Michael Forgac. <b>The Function of V-ATPases in Cancer</b>. <i>Physiol. Rev.</i> Vol. 96, 3, 1071-1091 (2016). doi.org/10.1152/physrev.00035.2015</p>                                                                                                                                                                                              |                                                                                                                                                                                                                                                                                                                                                                                                                                                                                                                                                                                                                                                                                                                                                                                                                                                                                                                                                                                                                                                                                                                                                                                                                                                                                                                                                                                                                                       |
| <p><b>Differentiation/ Dedifferentiation</b></p>             | <p>Park, C.K., Horton, N.C. <b>Structures, functions, and mechanisms of filament forming enzymes: a renaissance of enzyme filamentation</b>. <i>Biophys Rev</i> 11, 927–994 (2019). https://doi.org/10.1007/s12551-019-00602-6 <i>Thermodynamics, structure and differentiation</i></p> <p>Guanghong Wei, Wenhui Xi, Ruth Nussinov, and Buyong Ma. <b>Protein Ensembles: How Does Nature Harness Thermodynamic Fluctuations for Life? The Diverse Functional Roles of Conformational Ensembles in the Cell</b>. <i>Chem. Rev.</i> 116, 11, 6516–6551 (2016). doi.org/10.1021/acs.chemrev.5b00562</p> <p>Kate Luby-Phelps. <b>The physical chemistry of cytoplasm and its influence on cell function: an update</b>. <i>Molecular Biology of the Cell</i>, Vol. 24, No. 17 (2017). doi.org/10.1091/mbc.e12-08-0617 <i>Influence of biophysics on cell function.</i></p> <p>Aiman Alam-Nazki and J. Krishnan. <b>Spatial Control of Biochemical Modification Cascades and Pathways</b>. <i>Biophysical Journal</i>, Vol. 108, 12, 2912-2924 (2015). doi.org/10.1016/j.bpj.2015.05.012</p> <p>Vladimir N. Uversky. <b>Intrinsically Disordered Proteins and Their “Mysterious” (Meta)Physics</b>. <i>Front. Phys.</i>, vol. 7, 10 (2019). doi.org/10.3389/fphy.2019.00010 <i>Significance of IDPs for protein function.</i></p> <p>Vivek Kulkarnia, Prakash Kulkarnia. <b>Intrinsically disordered proteins and phenotypic switching: Implications in cancer</b>. <i>Progress in Molecular Biology and Translational Science</i>, Vol. 166, 63-84 (2019) doi.org/10.1016/bs.pmbts.2019.03.013</p> <p>Shachaf, C., Kopelman, A., Arvanitis, C. et al. <b>MYC inactivation uncovers pluripotent differentiation and tumour dormancy in hepatocellular cancer</b>. <i>Nature</i> 431, 1112–1117 (2004). https://doi.org/10.1038/nature03043</p> |                                                                                                                                                                                                                                                                                                                                                                                                                                                                                                                                                                                                                                                                                                                                                                                                                                                                                                        |                                                                                                                                                                                                                                                                                                                                                                                           | <p>Humphrey, J., Dufresne, E. &amp; Schwartz, M. <b>Mechanotransduction and extracellular matrix homeostasis</b>. <i>Nat Rev Mol Cell Biol</i> 15, 802–812 (2014). https://doi.org/10.1038/nrm3896</p> <p>Jordi Alcaraz, Ren Xu, Hidetoshi Mori, Celeste M Nelson, et al. <b>Laminin and biomimetic extracellular elasticity enhance functional differentiation in mammary epithelia</b>. <i>EMBO J</i>, 27:2829-2838, (2008) doi.org/10.1038/emboj.2008.206</p> <p>A. WayneOrr, Brian P.Helmke, Brett R.Blackman, Martin A.Schwartz. <b>Mechanisms of Mechanotransduction</b>. <i>Developmental Cell</i>, Vol. 10, 1, 11-20 (2006). doi.org/10.1016/j.devcel.2005.12.006</p> <p>V.M. Weaver,* O.W. Petersen, F. Wang et al. <b>Reversion of the Malignant Phenotype of Human Breast Cells in Three-Dimensional Culture and In Vivo by Integrin Blocking Antibodies</b>. <i>JCB</i>, Vol. 137, 1, 231–245 (1997). doi.org/10.1083/jcb.137.1.231</p> <p>BL Ricca, G Venugopalan, S Furuta et al. <b>Transient external force induces phenotypic reversion of malignant epithelial structures via nitric oxide signaling</b>. <i>eLife</i> 2018;7:e26161 doi: 10.7554/eLife.26161</p> <p>Tilghman RW, Cowan CR, Mih JD, Koryakina Y, Gioeli D, Slack-Davis JK, et al. <b>Matrix Rigidity Regulates Cancer Cell Growth and Cellular Phenotype</b>. <i>PLoS ONE</i> 5(9): e12905. (201). https://doi.org/10.1371/journal.pone.0012905</p> |

Legend: Compilation of publications in which it is shown that the individual forms of cellular work are causally or indirectly involved in the development or manifestation of cancer indicators.
